# Supplementary material for: High Incidence of Non-Random Template Strand Segregation and Asymmetric Fate Determination In Dividing Stem Cells and their Progeny
Source: PLOS journal article supplement (doi:10.1371/journal.pbio.0050102), 2007-04-11
Supplement: S2 (10.1371/journal.pbio.0050102.s002) [file journal.pbio.0050102.s002]

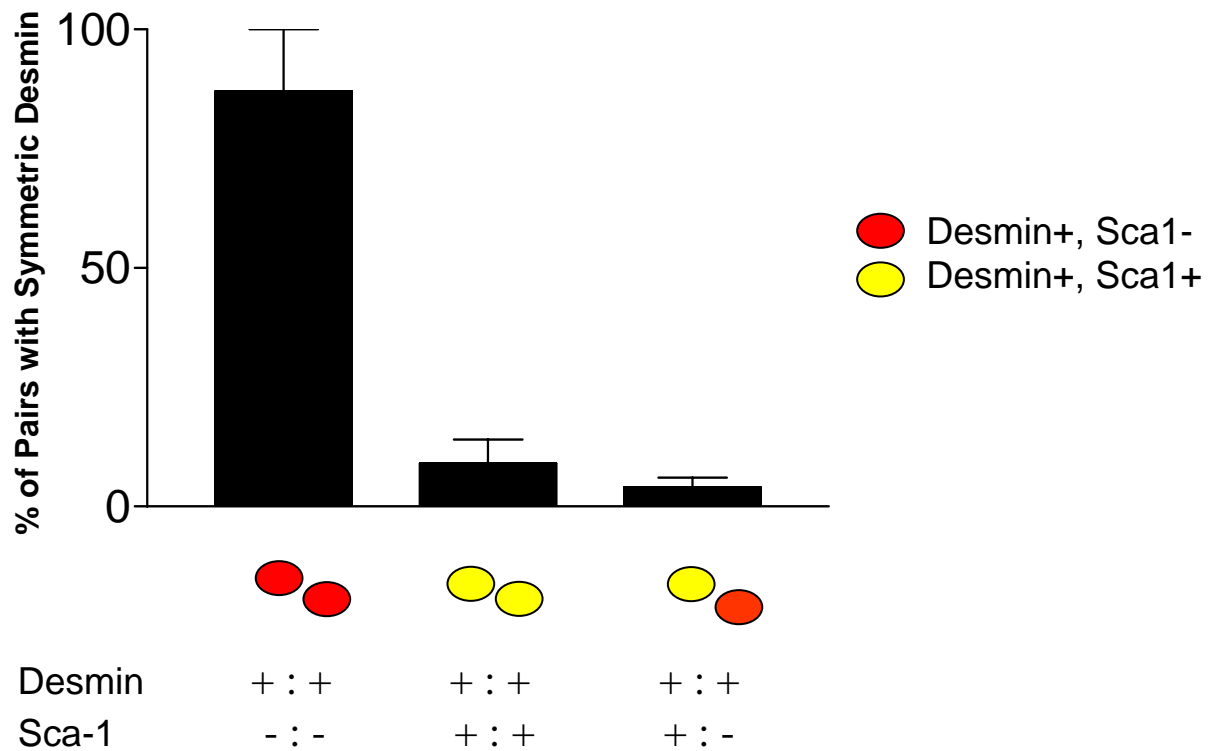

**Figure S2. Quantitation of Sca-1 expression among daughter cell pairs with symmetric expression of Desmin.**

The data from experiments as in Figure 4A were quantified. Pairs with symmetric Desmin expression were distinguished based on the pattern of Sca-1 expression (both negative, both positive, or asymmetric). The legend for individual cells is shown to the right and the legends for the cell pairs are shown below. Data represent mean  $\pm$  S.E.M. ( $n = 4$ ).
